# Supplementary material for: Dynamic Allocation of Carbon Storage and Nutrient-Dependent Exudation in a Revised Genome-Scale Model of Prochlorococcus
Source: PubMed Central journal article supplement (PMC7900632; doi:10.3389/fgene.2021.586293), 2021-02-09
Supplement: Data_Sheet_1.pdf [file Data_Sheet_1.pdf]

Reference: Stephen F. Altschul, Thomas L. Madden, Alejandro A. Schaffer, Jinghui Zhang, Zheng Zhang, Webb Miller, and David J. Lipman (1997), "Gapped BLAST and PSI-BLAST: a new generation of protein database search programs", *Nucleic Acids Res.* 25:3389-3402.

Reference for composition-based statistics: Alejandro A. Schaffer, L. Aravind, Thomas L. Madden, Sergei Shavirin, John L. Spouge, Yuri I. Wolf, Eugene V. Koonin, and Stephen F. Altschul (2001), "Improving the accuracy of PSI-BLAST protein database searches with composition-based statistics and other refinements", *Nucleic Acids Res.* 29:2994-3005.

Database: /bio/db/fasta/genes/T00004.pep  
3,564 sequences; 1,136,958 total letters

Query= pmm:PMM0774 K01687 dihydroxy-acid dehydratase [EC:4.2.1.9] | (GenBank) ilvD; Dihydroxy-acid dehydratase (A)

Length=559

Sequences producing significant alignments:

|  | K number | Score (Bits) | E Value |
|--|----------|--------------|---------|
|--|----------|--------------|---------|

Top 5

|                                     |                             |                                           |                        |                      |      |
|-------------------------------------|-----------------------------|-------------------------------------------|------------------------|----------------------|------|
| <input checked="" type="checkbox"/> | <a href="#">syn:slr0452</a> | ilvD; dihydroxyacid dehydratase           | <a href="#">K01687</a> | <a href="#">838</a>  | 0.0  |
| <input checked="" type="checkbox"/> | <a href="#">syn:sll0154</a> | hypothetical 35.6 kD protein              |                        | <a href="#">29.6</a> | 0.47 |
| <input type="checkbox"/>            | <a href="#">syn:slr1219</a> | ureE; urease accessory protein E          | <a href="#">K03187</a> | <a href="#">26.6</a> | 2.5  |
| <input type="checkbox"/>            | <a href="#">syn:sll0180</a> | unknown protein                           |                        | <a href="#">26.9</a> | 3.2  |
| <input type="checkbox"/>            | <a href="#">syn:slr0326</a> | unknown protein                           |                        | <a href="#">26.2</a> | 3.6  |
| <input type="checkbox"/>            | <a href="#">syn:sll1866</a> | hypothetical protein                      | <a href="#">K07566</a> | <a href="#">25.4</a> | 7.2  |
| <input type="checkbox"/>            | <a href="#">syn:sll1513</a> | ccsA; c-type cytochrome synthesis protein |                        | <a href="#">25.8</a> | 7.8  |

>[syn:slr0452](#) ilvD; dihydroxyacid dehydratase

[↑ Top](#)

Length=561

Score = 838 bits (2166), Expect = 0.0, Method: Compositional matrix adjust.  
Identities = 391/557 (70%), Positives = 474/557 (85%), Gaps = 0/557 (0%)

|       |     |                                                               |     |
|-------|-----|---------------------------------------------------------------|-----|
| Query | 2   | NKLRSSAITQGVQRSPNRSMLRAVGFSDDEFKPIIGVANGFSTITPCNMGLNKLALKA    | 61  |
|       |     | N RS ITQG QRSPNR+MLRAVGF D+DFTKPI+G+ANG+STITPCNMG+N LAL+AE    |     |
| Sbjct | 3   | NNPRSQVITQGTQRSPNRAMLRAVGFSDDEFKPIIGVANGFSTITPCNMGINDLALRAE   | 62  |
| Query | 62  | ESIREAGMPQMFGTITVSDGISMGTEGMKYSLSREVIADSIETACNAQSMGVLAIIGG    | 121 |
|       |     | +R AG MPQ+FGTIT+SDGISMGTEGMKYSLSREVIADSIET CN Q MDGVLAIIGG    |     |
| Sbjct | 63  | AGLRTAGAMPQLFGTITISDGISMGTEGMKYSLSREVIADSIETVCNGQRMGVLAIIGG   | 122 |
| Query | 122 | CDKNMPGAMIAIARMNIPSIIFYGGTIKPGKLNEDLTVSAFEAVGQLTSGKINEKRLI    | 181 |
|       |     | CDKNMPGAMIA+AR+NIPSI+YGGTIKPG GEDLTVSAFEAVGQ ++GKI+E+ L       |     |
| Sbjct | 123 | CDKNMPGAMIAMARLNIPSIIFYGGTIKPGHYAGEDLTVSAFEAVGQYSAGKIDEETLY   | 182 |
| Query | 182 | EVEKNCIPGAGSCGMFTANTMSAVIEVLGLSLPYSSTMAAEDYEKVSAEKSAEILVDA    | 241 |
|       |     | +E+N PGAGSCGMFTANTMS+ E +G+SLPYSSTMAA D EK S E+SA++LV+A       |     |
| Sbjct | 183 | GIERNACPGAGSCGMFTANTMSSAFEAMGMSLPYSSTMAAVDGEKADSTEESAKVLVEA   | 242 |
| Query | 242 | IRKDIRPLTLMTKESFENAITVIMAIGGSTNAVLHILAIANTAGIDINIDDFERIRQKVP  | 301 |
|       |     | I+K I P ++T+++FENAI VIMA+GGSTNAVLH+LAIANT G+ +++DDFE IR KVP   |     |
| Sbjct | 243 | IKKQILPSQILTRKAFENAIIVIMAVGGSTNAVLHLLAIANTIGVPLSLDDFETIRHKVP  | 302 |
| Query | 302 | VICDLKPSGKYVTVDLHKAGGIPQVMKILLNTGLIHGNCRNIEGKTVESLKDIPVKPPE   | 361 |
|       |     | V+CDLKPSGKYVT +LH AGGIPQVMKILL G++HG+ I G+T+ E L DIP +PP      |     |
| Sbjct | 303 | VLCDLKPSGKYVTTNLHAAGGIPQVMKILLVNGILHGDALITGQTIAEVLADIPDQPPA   | 362 |
| Query | 362 | NQDVIRDIDNPLYKKGHLAILKGNLASEGCVAKISGKPNVLPKGPARI FESEEDCLKSIL | 421 |
|       |     | QDVI D+P+Y+++GHLA+LKGNA+EG VAKISG+K PV+ GPA++FESEEDCL++IL     |     |
| Sbjct | 363 | GQDVIHSDDDPVYQEGHLAVLKGNLATEGSVAKISGVKKPVITGPAKVFSEEDCLEAIL   | 422 |
| Query | 422 | NNDIKAGNVVIRNEGPVGGPMREMLAPTS AIVGQGLGEKVALITDGRFSGGTYGLVVG   | 481 |
|       |     | I+AG+VVV+R EGP GPGMREMLAPTS+AI+G GLG+ V LITDGRFSGGTYGLVVG     |     |
| Sbjct | 423 | AGKIQAGDVVVRYEGPKGGPMREMLAPTS AIIAGLGDSVGLITDGRFSGGTYGLVVG    | 482 |
| Query | 482 | HIAPEAAVGGNIALIKEGDLITVDATNQLIEVELSDEELEMRRINWEKPSKYYKGVLSK   | 541 |
|       |     | H+APEA VGG IAL++EGD IT+DA +L+++ +S+EEL RR W P +Y +G+L+K       |     |
| Sbjct | 483 | HVAPEAYVGGAIALVQEGDQITIDAGKRLQLNISEEELARRAQWTPPPRYPRGILAK     | 542 |
| Query | 542 | YSRIVSTSSLGAVTDLE                                             | 558 |

>[syn:s110154](#) hypothetical 35.6 kD protein[↑ Top](#)

Length=462

Score = 29.6 bits (65), Expect = 0.47, Method: Compositional matrix adjust.  
Identities = 15/57 (26%), Positives = 31/57 (54%), Gaps = 2/57 (4%)

Query 126 MPGAMIAIARMNIPISIFIVGGTIKPGKLNAGEDLTVVSAFEAVGQLTSGKINEKRLIE 182  
 +P AIA+ +P I+I +PG+ ++ TV A+ Q++S ++ + L++  
 Sbjct 341 IPEIQTATAIAKAKVPRIYICNVMTQPGE--TDNYTVSDHLTAIDQVSSARLYDAVLVQ 395

>[syn:slr1219](#) ureE; urease accessory protein E[↑ Top](#)

Length=142

Score = 26.6 bits (57), Expect = 2.5, Method: Composition-based stats.  
Identities = 16/42 (38%), Positives = 24/42 (57%), Gaps = 7/42 (17%)

Query 139 PSIFIIY---GGTIKPGKL----NGEDLTVVSAFEAVGQLTSG 173  
 PS+FI G ++PG GE +T+++A E + LTSG  
 Sbjct 39 PSLFIQLPRGSFLRPGDCLGSPTGETITILAADEPLLHLTSG 80

>[syn:s110180](#) unknown protein[↑ Top](#)

Length=501

Score = 26.9 bits (58), Expect = 3.2, Method: Compositional matrix adjust.  
Identities = 17/55 (31%), Positives = 26/55 (47%), Gaps = 1/55 (2%)

Query 423 NDIKAG-NVVVIRNEGPGVGGPMREMLAP TSAIVGQGLGEKVALITDGRFSGGTY 476  
 ND++ G V V+R++G G G ++PT+ Q + KV DG Y  
 Sbjct 333 NDLRLGLPVEVRSDDGQAGEVGRISFISPTANRNDQSILAKVIFKNDGSLRNNQY 387

>[syn:slr0326](#) unknown protein[↑ Top](#)

Length=147

Score = 26.2 bits (56), Expect = 3.6, Method: Composition-based stats.  
Identities = 14/39 (36%), Positives = 24/39 (62%), Gaps = 2/39 (5%)

Query 292 DFERIRQKVPVICDLKPSGKYVTVDLHKAGGIPQVMKIL 330  
 + + QKV VIC+L+ +GK T++ ++ I Q+ K L  
 Sbjct 89 NLQEFAQKVSVICNLETAGKIETMEAYER--IKQLWKS L 125

>[syn:s111866](#) hypothetical protein[↑ Top](#)

Length=199

Score = 25.4 bits (54), Expect = 7.2, Method: Compositional matrix adjust.  
Identities = 11/29 (38%), Positives = 17/29 (59%), Gaps = 0/29 (0%)

Query 327 MKILLNTGLIHGNCRNIEGKTVVESLKDI 355  
 ++ILL TG + N+ G+ +E L DI  
 Sbjct 120 LEILLQTGPLATTSANLSGQPPELKLADI 148

>[syn:s111513](#) ccsA; c-type cytochrome synthesis protein[↑ Top](#)

Length=334

Score = 25.8 bits (55), Expect = 7.8, Method: Compositional matrix adjust.  
Identities = 10/23 (43%), Positives = 15/23 (65%), Gaps = 0/23 (0%)

Query 34 KPIIGVANGFSTITPCNMGLNKL 56  
 KP I A+GF+ + C +G+N L  
 Sbjct 301 KPAILAASGFTVVWICYLGVNLL 323

| Lambda | K     | H     | a     | alpha |
|--------|-------|-------|-------|-------|
| 0.315  | 0.135 | 0.377 | 0.792 | 4.96  |

| Gapped<br>Lambda | K      | H     | a    | alpha | sigma |
|------------------|--------|-------|------|-------|-------|
| 0.267            | 0.0410 | 0.140 | 1.90 | 42.6  | 43.6  |

Effective search space used: 390292080

Matrix: BLOSUM62  
Gap Penalties: Existence: 11, Extension: 1  
Neighboring words threshold: 11  
Window for multiple hits: 40
